# Supplementary material for: The tarantula toxin GxTx detains K+ channel gating charges in their resting conformation
Source: PubMed Central journal article supplement — J Gen Physiol. 2019 Mar 4;151(3):292–315. doi: 10.1085/jgp.201812213 (PMC6400525; doi:10.1085/jgp.201812213), 2019-03-04
Supplement: JGP_201812213_sm.pdf [file JGP_201812213_sm.pdf]

## Supplemental material

Tilley et al. <https://doi.org/10.1085/jgp.201812213>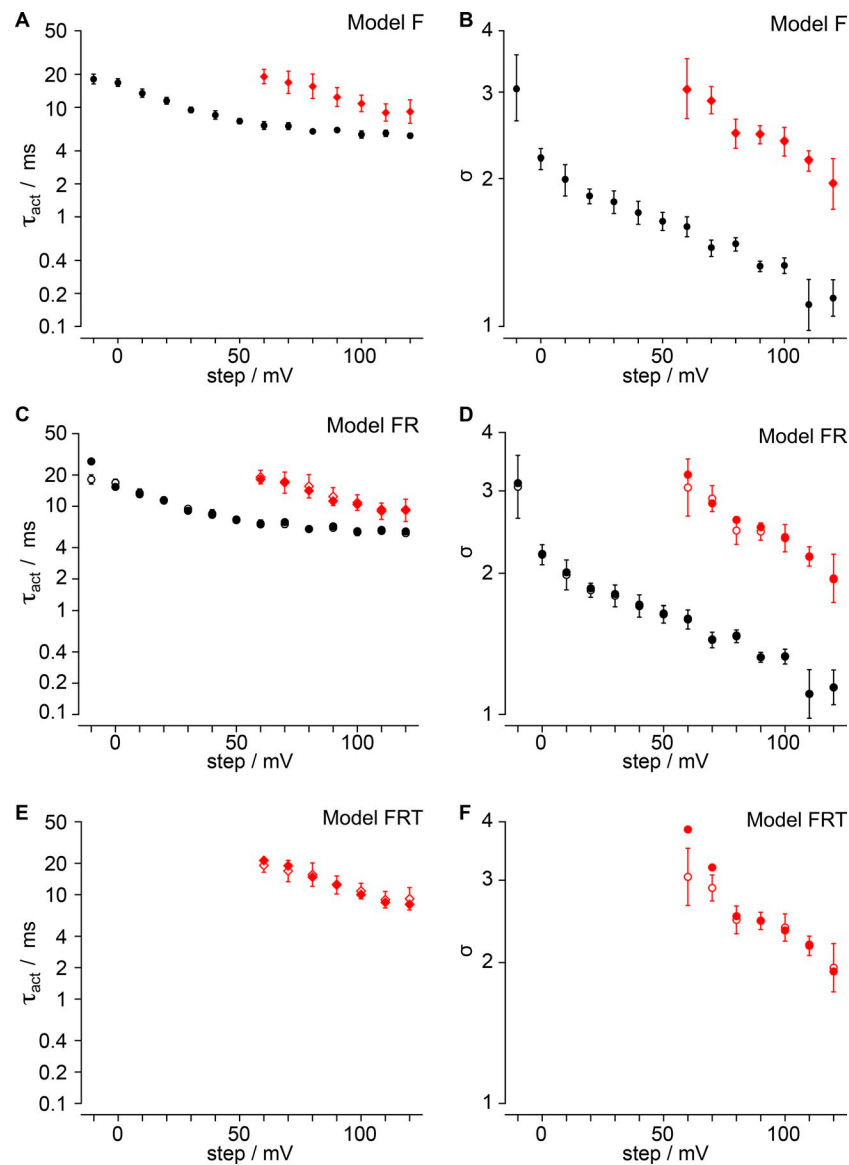

Figure S1. **Comparisons of kinetic models to fitted data parameters.** (A) Comparison of the values of  $\tau_{act}$  from fits of Model F simulations to  $\tau_{act}$  from Kv2.1 experiments in Fig. 2 C. Hollow circles or diamonds, mean Kv2.1  $\tau_{act} \pm$  SEM; filled circles,  $\tau_{act}$  from Model F fits; black, control; red, 1  $\mu$ M GxTx. (B) Comparison of the values of  $\sigma$  from fits of Model F simulations to  $\sigma$  from Kv2.1 experiments in Fig. 3 B. Hollow circles or diamonds, mean Kv2.1  $\sigma \pm$  SEM; filled circles,  $\sigma$  from Model F fits; black, vehicle; red, 1  $\mu$ M GxTx. (C) Comparison of the values of  $\tau_{act}$  from fits of Model FR simulations to  $\tau_{act}$  from Kv2.1 experiments in Fig. 2 C. Hollow circles or diamonds, mean Kv2.1  $\tau_{act} \pm$  SEM; filled circles,  $\tau_{act}$  from Model FR fits; black, control; red, 1  $\mu$ M GxTx. (D) Comparison of the values of  $\sigma$  from fits of Eq. 3 to simulated open probability of Model FR to  $\sigma$  from Fig. 3 B. Hollow circles, mean Kv2.1  $\sigma \pm$  SEM; filled circles,  $\sigma$  from model fits; black, vehicle; red, 1  $\mu$ M GxTx. (E) Comparison of the values of  $\tau_{act}$  from fits of Model FRT simulations to  $\tau_{act}$  from Kv2.1 experiments in Fig. 2 C. Hollow diamonds, mean 1  $\mu$ M GxTx Kv2.1  $\tau_{act} \pm$  SEM; filled diamonds,  $\tau_{act}$  from model fits. (F) Comparison of the values of  $\sigma$  from fits of Model FRT simulations to  $\sigma$  from Kv2.1 experiments in Fig. 3 B. Hollow circles, mean 1  $\mu$ M GxTx Kv2.1  $\sigma \pm$  SEM; filled circles,  $\sigma$  from model fits.
